# Supplementary material for: Neuronal GHS-R Differentially Modulates Feeding Patterns under Normal and Obesogenic Conditions
Source: MDPI journal article supplement (doi:10.3390/biom12020293), 2022-02-11
Supplement: s1 [file s1]

## Supplementary Figure S1

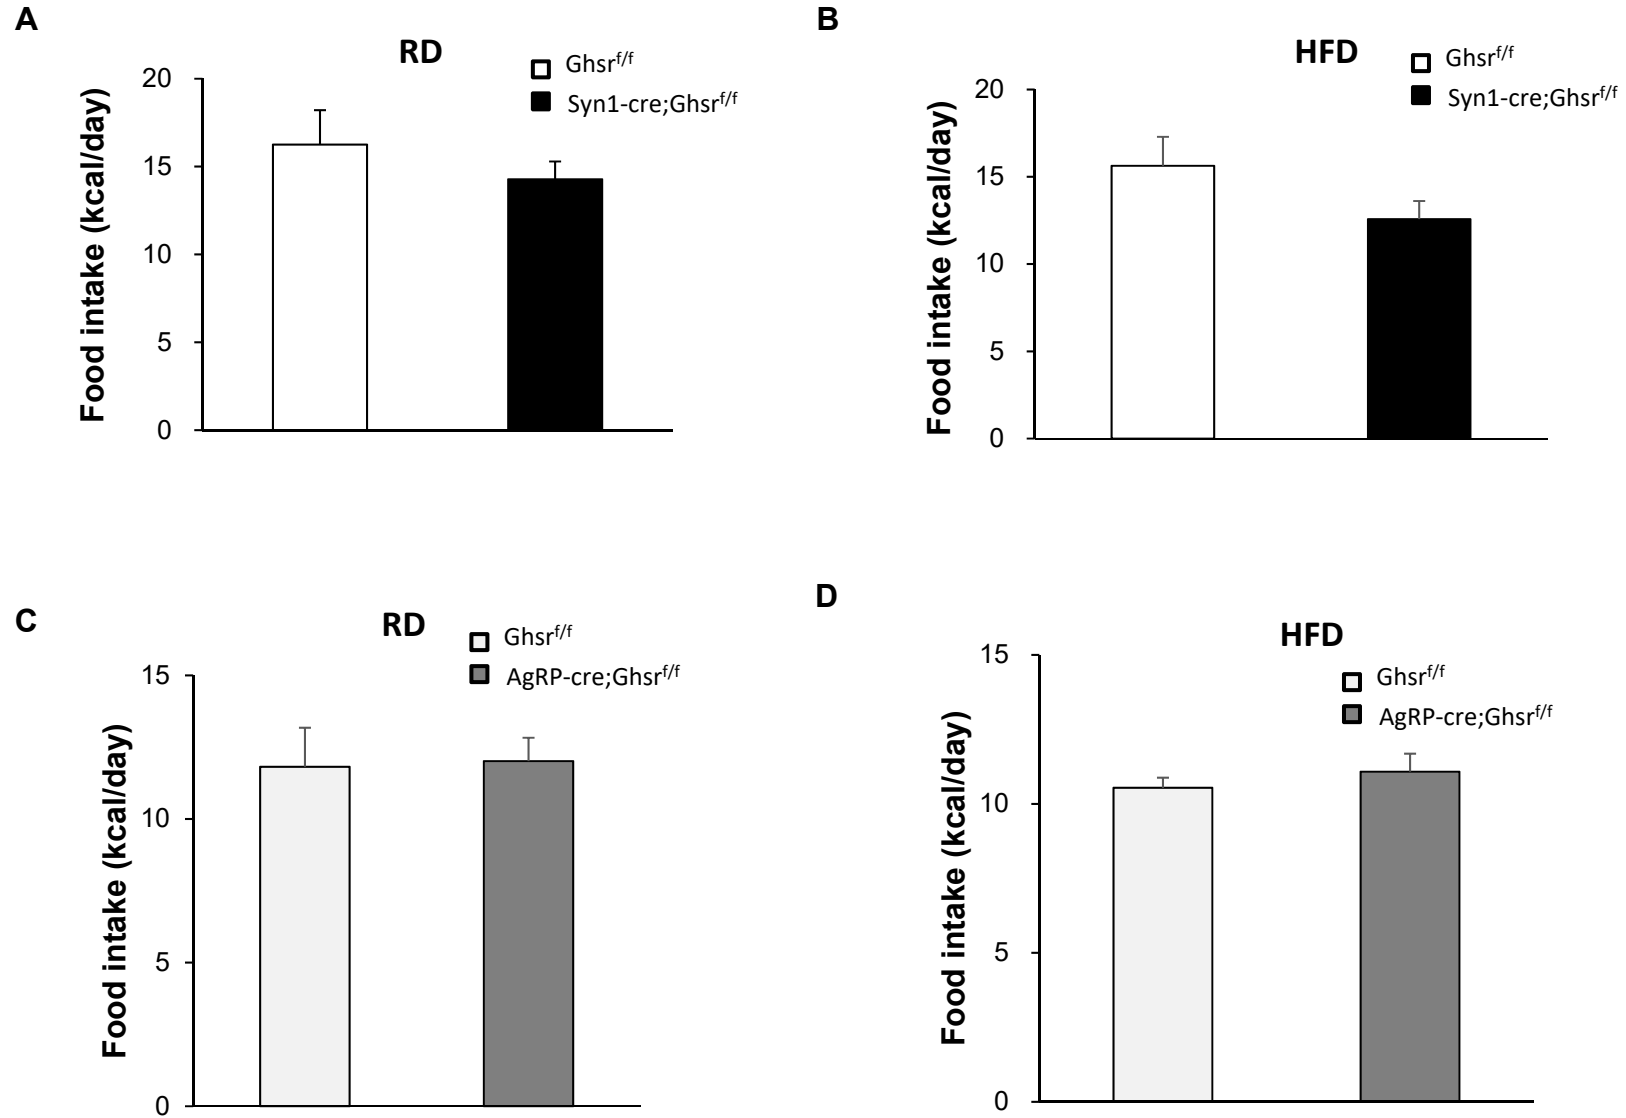

**Figure S1.** Total food intake in  $Syn1-Cre;Ghsr^{f/f}$  and  $AgRP-Ghsr^{f/f}$  mice. RD (A, C) and HFD (B, D),  $n=5$ , All data are presented as means  $\pm$  SEM.
